# Supplementary material for: High-Frequency Microdomain Ca2+ Transients and Waves during Early Myelin Internode Remodeling
Source: PubMed Central journal article supplement — Cell Rep. 2019 Jan 2;26(1):182–191.e5. doi: 10.1016/j.celrep.2018.12.039 (PMC6316190; doi:10.1016/j.celrep.2018.12.039), 2019-01-02
Supplement: mmc1.pdf [file mmc1.pdf]

**Cell Reports, Volume 26**

**Supplemental Information**

**High-Frequency Microdomain Ca<sup>2+</sup> Transients  
and Waves during Early Myelin Internode Remodeling**

**Arne Battfeld, Marko A. Popovic, Sharon I. de Vries, and Maarten H.P. Kole**

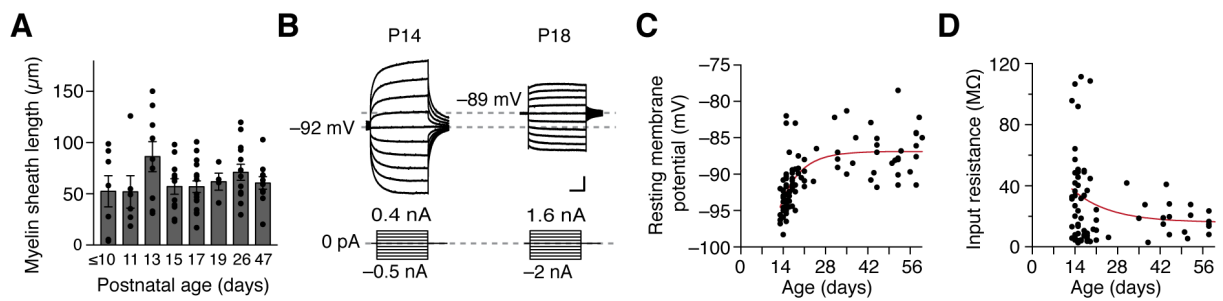

**Figure S1 Oligodendrocytes undergo developmental changes in membrane properties. Related to Figures 1 and 3.**

(A) Internodal length does not change during L5 axon myelin maturation ( $p = 0.24$ , ANOVA). The plot shows bins of 2 days. (B) Whole-cell current-clamp recordings of oligodendrocytes at P14 and P18 in response to hyperpolarizing and depolarizing current injections. Note the large difference in input resistance and membrane potential. Scale bars 5 mV and 0.2 s. (C) OL resting membrane potential is correlated with postnatal age (Pearson  $r = 0.59$ ,  $p = 0.0001$ ). Data were fitted with a single exponential equation ( $y = -54.72 \times e^{(-0.15 \times x)} - 86.88$ ). (D) OL input resistance as a function of age (Pearson  $r = -0.21$ ,  $P = 0.06$ ). Data were fitted with a single exponential equation ( $y = 62.97 \times e^{(0.08 \times x)} + 16$ ).

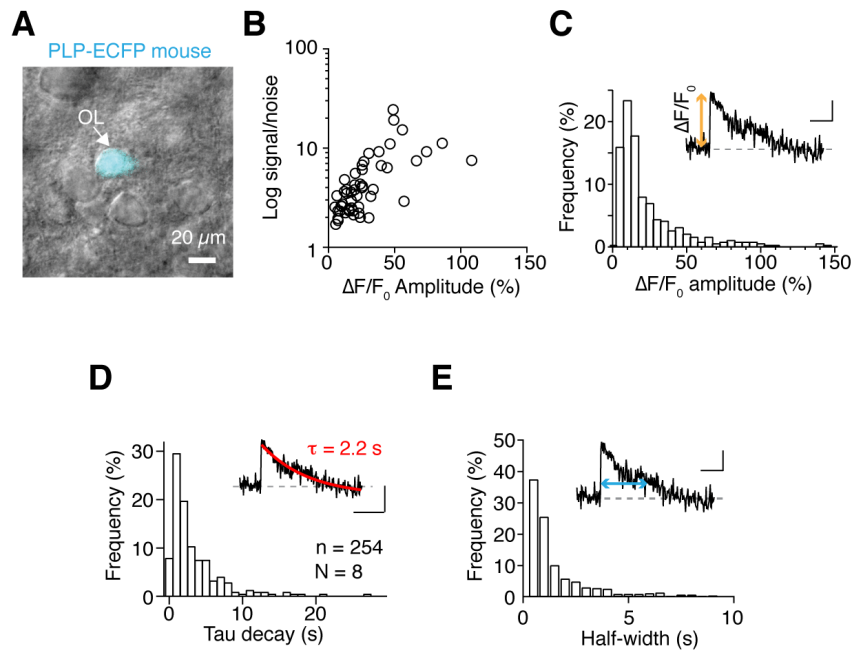

**Figure S2 Properties of  $\text{Ca}^{2+}$  transients in the myelin sheath. Related to Figure 2.**

(A) Combined oblique contrast and CFP fluorescence image showing a single OL (cyan) at P14 (arrow). Scale bar  $20 \mu\text{m}$ . (B) Semi-logarithmic plot showing the signal-to-noise ratio versus event amplitude for randomly selected events ( $n = 51$ ) from 12 different OLs and experiments. (C) Histogram of  $\Delta F/F$  change for single  $\text{Ca}^{2+}$  transients ( $n = 390$  events,  $N = 22$  OLs). (D) Histogram of the decay time constant for  $\text{Ca}^{2+}$  events. Inset, typical  $\text{Ca}^{2+}$  transient; decay fitted with single exponential equation. Scale bars  $5\% \Delta F/F$  and  $1$  s. ( $n = 254$  events,  $N = 8$  OLs) (E) Histogram of the half-width of myelin  $\text{Ca}^{2+}$  events ( $n = 427$  events,  $N = 10$  OLs).

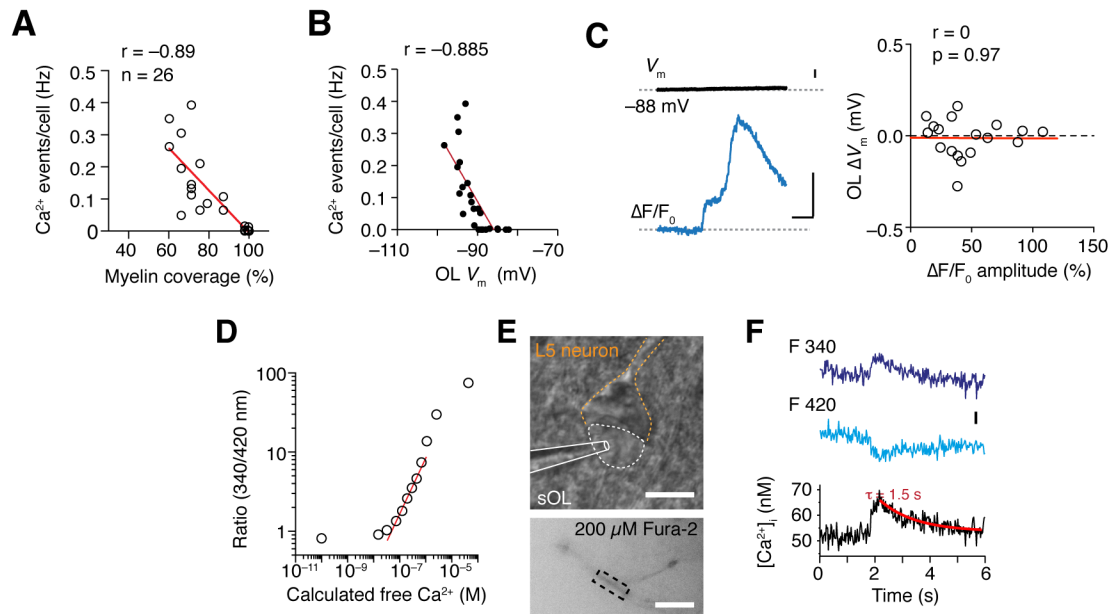

**Figure S3 Developmental changes of  $\text{Ca}^{2+}$  events and determination of  $\text{Ca}^{2+}$  concentration. Related to Figure 1 and 3.**

(A) Plot showing the negative correlation between myelin coverage and myelin  $\text{Ca}^{2+}$  event frequency (Spearman  $r = -0.890$ ,  $p = 0.0001$ ,  $n = 26$  matched pairs). (B) Calcium event frequency is highly correlated with OL resting membrane potential (Spearman  $r = -0.885$ ,  $p = 0.0001$ ,  $n = 25$  cells,  $N = 17$  mice). (C) *Left*, example trace of a large  $\text{Ca}^{2+}$  event (blue). Note that the somatic resting membrane potential does not change. Scale bars, 1 mV, 20%  $\Delta F/F$  and 2 s. *Right*, summary data illustrate no correlation between  $\text{Ca}^{2+}$  change and membrane potential (Pearson  $r = 0$ ,  $p = 0.97$ , 18 large amplitude events from 11 cells). (D) Calibration curve of calculated free  $\text{Ca}^{2+}$  of the intracellular solution plotted against the obtained ratio of 340/420 nm fluorescence. The linear part of the fura-2  $\text{Ca}^{2+}$  response is indicated with a linear fit. Fluorescence values were measured on the same system with the solutions used for experiments and measured in the tip of pipettes with low pressure applied to keep the concentration constant. Background subtraction was applied to the raw data before calculating the ratio. (E) *Top*, oblique contrast image of a satellite OL (sOL) in direct contact with a L5 neuron. *Bottom*, fura-2 epifluorescence image of the same cell showing two processes with a box indicating the location of the event shown in F. Scale bars 10  $\mu\text{m}$ . (F) *Top*, background subtracted traces that show the opposite response of the fura-2  $\text{Ca}^{2+}$  indicator at excitation wavelengths of 340 and 420 nm. Scale bar 100 arbitrary units (AU). *Bottom*, the processed corresponding trace shown as 340/420 ratio and as calibrated  $\text{Ca}^{2+}$  concentration. Overlaid in red is a single exponential fit to the decay.

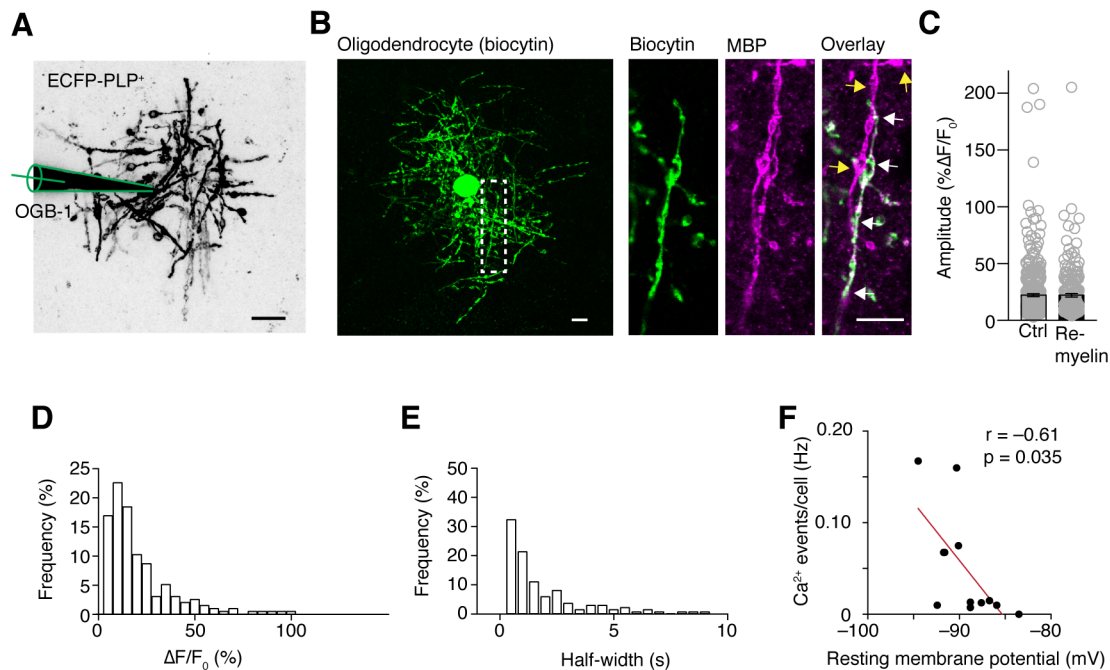

**Figure S4 Remyelinating oligodendrocytes express MBP with myelin  $\text{Ca}^{2+}$  transients similar to early development. Related to Figure 4.**

(A) Example z-projected confocal image of an OL filled with OGB-1 in the cuprizone-induced remyelinating somatosensory cortex. Scale bar 20  $\mu\text{m}$ . (B) During whole-cell recording a single oligodendrocyte was filled with biocytin (green) and post-hoc labeled for MBP. The box indicates the processes shown in higher magnification on the right, revealing co-localization (white arrows) with myelin basic protein (MBP, magenta). An adjacent internode from another OL is not co-labeled for biocytin (yellow arrows). Two oligodendrocytes were recovered and both showed positive labeling. Scale bars 10  $\mu\text{m}$ . (C) Summary plot of  $\Delta F/F_0$  amplitude for transients during development and remyelination show no difference (MW-test,  $p = 0.47$ ). (D) Histogram distribution of the  $\Delta F/F_0$  of myelin  $\text{Ca}^{2+}$  transients in remyelinating oligodendrocytes ( $n = 195$  events,  $N = 10$  OLs). (E) Histogram of the half-width of  $\text{Ca}^{2+}$  events of remyelinating oligodendrocytes ( $n = 163$  events,  $N = 8$  OLs). (F) Similar as during at early postnatal ages, the  $\text{Ca}^{2+}$  event rate is correlated with the OL resting membrane potential (Spearman  $r = -0.61$ ,  $p = 0.035$ ,  $n = 12$  OLs,  $N = 10$  animals).

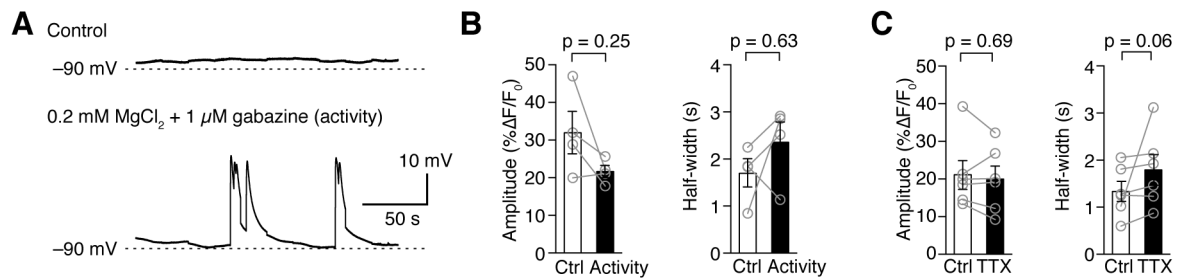

**Figure S5 Ca<sup>2+</sup> transient amplitude and half-width in myelin are not modulated by neuronal activity. Related to Figure 5.**

(A) Current-clamp recordings from an OL in control conditions (top) and after pharmacological increase of activity (bottom). During increased activity, several large depolarization episodes can be seen reflecting increased neuronal firing. Traces were recorded with 4-second gaps and were concatenated for display. (B) Summary plots for Ca<sup>2+</sup> event amplitude and Ca<sup>2+</sup> event half-width for control and increased activity conditions. No changes were observed in 4 OLs. (C) Summary plots of Ca<sup>2+</sup> event amplitude and half-width during control and in the presence of the sodium channel blocker tetrodotoxin (TTX) show no alterations (n = 6 OLs).

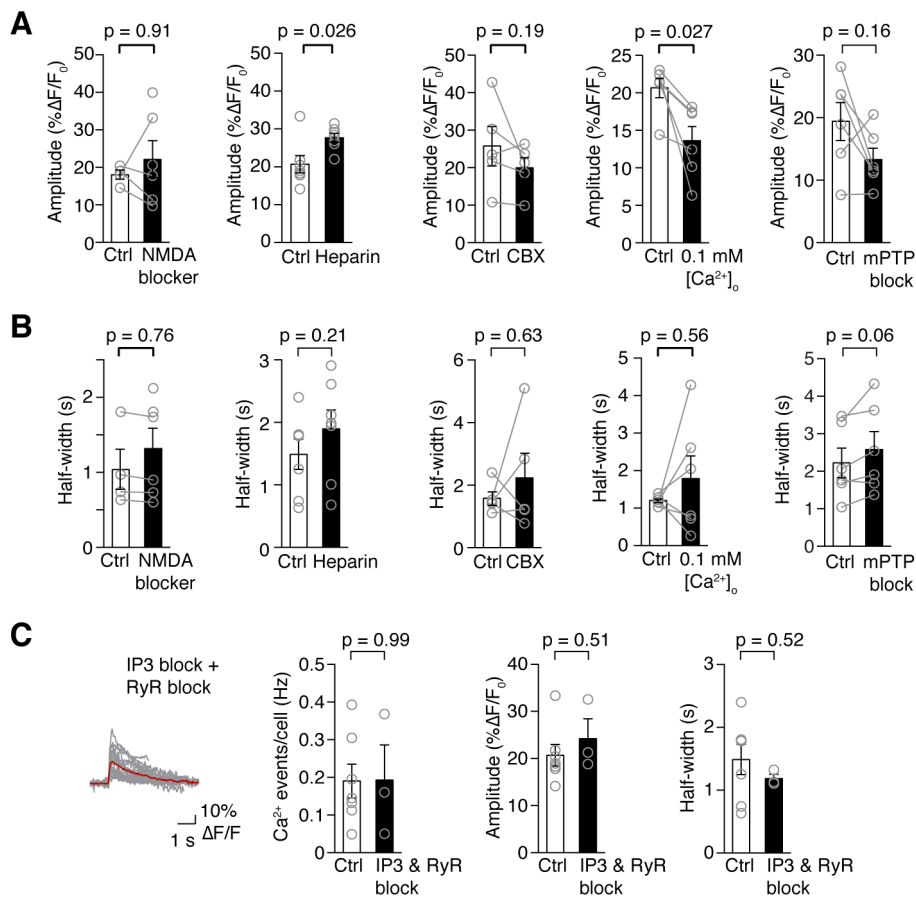

**Figure S6 Effect of pharmacological blockers on microdomain  $Ca^{2+}$  transients. Related to Figure 6.**

**(A)** Population data showing amplitudes of  $Ca^{2+}$  transients before (open bars) and after wash in of indicated blockers (black bars). Heparin was used intracellularly and experiments could not be performed paired (Mann-Whitney test). NMDA blockers are pooled data of paired control-DAP5 and intracellular MK-801 experiments (Mann-Whitney test). All other experiments were conducted paired (Wilcoxon signed rank test). P values of the statistical tests are given in the figure. **(B)** Summary plots of the half-width in control and in the presence of indicated blockers. The half-width did not change with any of the tested pharmacological compounds. Results of statistical test are given in the figure. The same tests as in **A** were used for the different experiments. **(C)** *Left*, In the presence of the intracellular  $IP_3$ R blocker heparin and intracellular ryanodin receptor (RyR) blockers dantrolene and ruthenium red, no alterations in myelin  $Ca^{2+}$  transients are observed. *Right*, Summary plots for  $Ca^{2+}$  event frequency, amplitude and half-width show no difference to control cells (all Mann-Whitney tests). For **A-C**, individual data points depict one experiment. Mean  $\pm$  SEM are shown for all summary plots.
